# Supplementary material
Source: publisher figshare collection journal article supplement (https://gsajournals.figshare.com/ndownloader/files/18045095)
Supplement: Supplementary file 1 [file 18045095]

## Sheet: Table S6
Table S6: Novel deletions identified in all four classes of progeny used in this study.
Maternal Genotype	Individual	Chromosome	First Deleted Position	Last Deleted Position	Samtools Score	Alt	Ref	Identified by	Alt size (bp)	Ref size (bp)	Size of Deletion (bp)	Notes
Canton-S/w1118	cs6.6	chr2L	17433064	17433069	222	G	GACGTTA	Samtools	1	7	6
Canton-S/w1118	cs6.3	chr2L	3703027	3703034	222	TGGAT	TGGATAAGCGGAT	Samtools	5	13	8
Canton-S/w1118	w13.13	chr2L	3725723	3725733	211	Taa	TAAGCCAGCTcaaa	Samtools	3	14	11
Canton-S/w1118	cs7.5	chr2L	4088590	4088591	222	TG	TGAG	Samtools	2	4	2
Canton-S/w1118	cs8.3	chr2L	4556166	4556169	222	TGC	TGCTGGC	Samtools	3	7	4
Canton-S/w1118	w3.24	chr2R	9816930	9816933	222	TGG	TGGAGGG	Samtools	3	7	4
Canton-S/w1118	cs13.18	chr3L	1129606	1129609	221	AAC	AACTCAC	Samtools	3	7	4
Canton-S/w1118	w13.13	chr3L	1985520	1985521	222	CA	CAGA	Samtools	2	4	2
Canton-S/w1118	w3.26	chr3L	910278	910278	222	A	AG	Samtools	1	2	1
Canton-S/w1118	cs6.7	chr3R	25792556	25792565	222	AG	AGTGCTGTGCTG	Samtools	2	12	10
Canton-S/w1118	cs13.10	chr3R	7528471	7528471	203	GC	GCC	Samtools	2	3	1
c(3)G68/+	c3g-het-7.10	chr2R	7696415	7696435	222	GGGA	GGGAAGGTGTCAACGCCCAACAGGA	Samtools	4	25	21
c(3)G68/c(3)G68	c3g-hom-10.5	chr2L	2302100	2302115	na	na	na	Pindel	na	na	8	Complex deletion, position approximate
c(3)G68/c(3)G68	c3g-hom-6.10	chr2L	22416752	22416765	222	ca	cactgccttgcttcga	Samtools	2	16	14
c(3)G68/c(3)G68	c3g-hom-3.4	chr2L	5043242	5043244	222	C	CACT	Samtools	1	4	3
c(3)G68/c(3)G68	c3g-hom-3.1	chr2L	5407434	5407436	222	GTATTA	GTATTATTA	Samtools	6	9	3
c(3)G68/c(3)G68	c3g-hom-5.1	chr2R	15383980	15383982	222	ggaagaag	ggaagaagaag	Samtools	8	11	3
c(3)G68/c(3)G68	c3g-hom-10.11	chr3L	13196279	13196283	222	TGT	TGTCAAGT	Samtools	3	8	5
c(3)G68/c(3)G68	c3g-hom-5.5	chr3L	15122842	15122842	222	A	AG	Samtools	1	2	1
c(3)G68/c(3)G68	c3g-hom-3.5	chr3L	16152952	16152963	222	TGTTTA	TGTTTACTATAAAGTTTA	Samtools	6	18	12
c(3)G68/c(3)G68	c3g-hom-6.4	chr3R	14011236	14011238	222	TTTAT	TTTATTAT	Samtools	5	8	3
corolla129/corolla129	corolla-hom-4.13	chrX	5413009	5413011	222	CAAG	CAAGAAG	Samtools	4	7	3
